# Supplementary material
Source: PubMed Central journal article supplement (PMC7193943)
Supplement: NIHMS1537656-supplement-1.pdf [file NIHMS1537656-supplement-1.pdf]

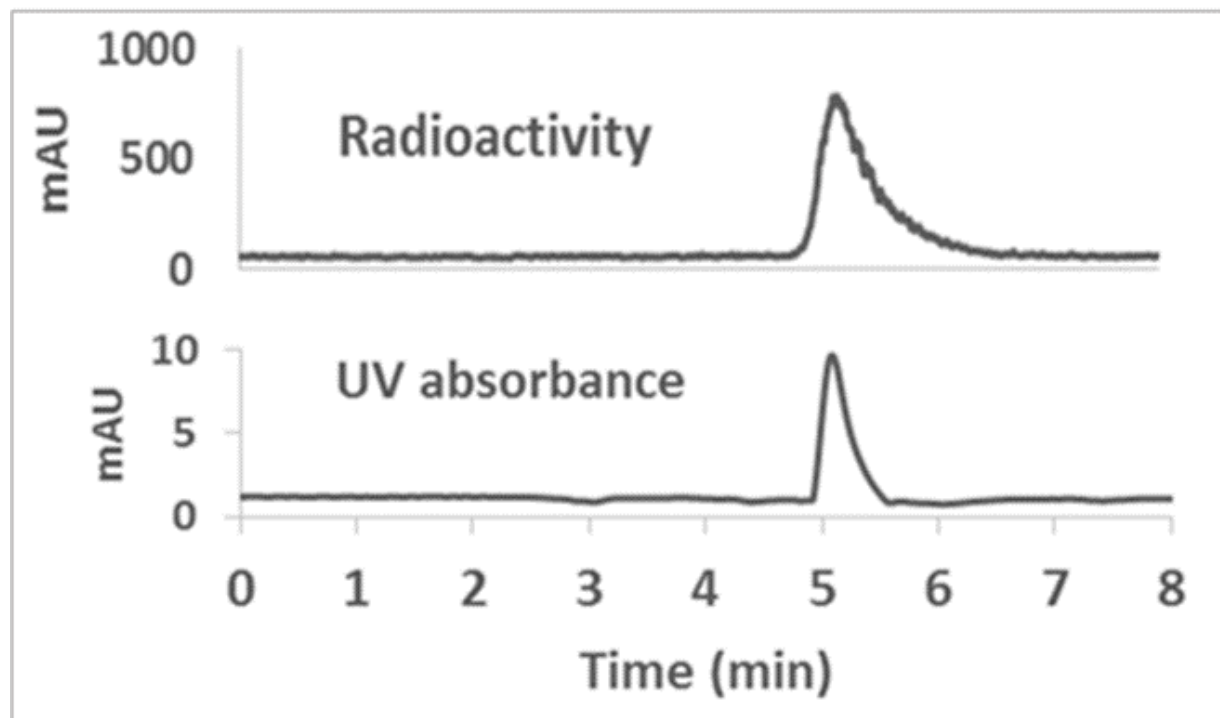

**Fig. S1.** HPLC chromatogram of [ $^{18}\text{F}$ ]fluoroethyl crizotinib [ $^{18}\text{F}$ ]**1**, co-injected with the non-radioactive standard **1**. Analytical  $\text{C}_{18}$  column; 60% MeCN/40%  $\text{H}_2\text{O}$ /0.1% TFA, flow 1 mL/min.

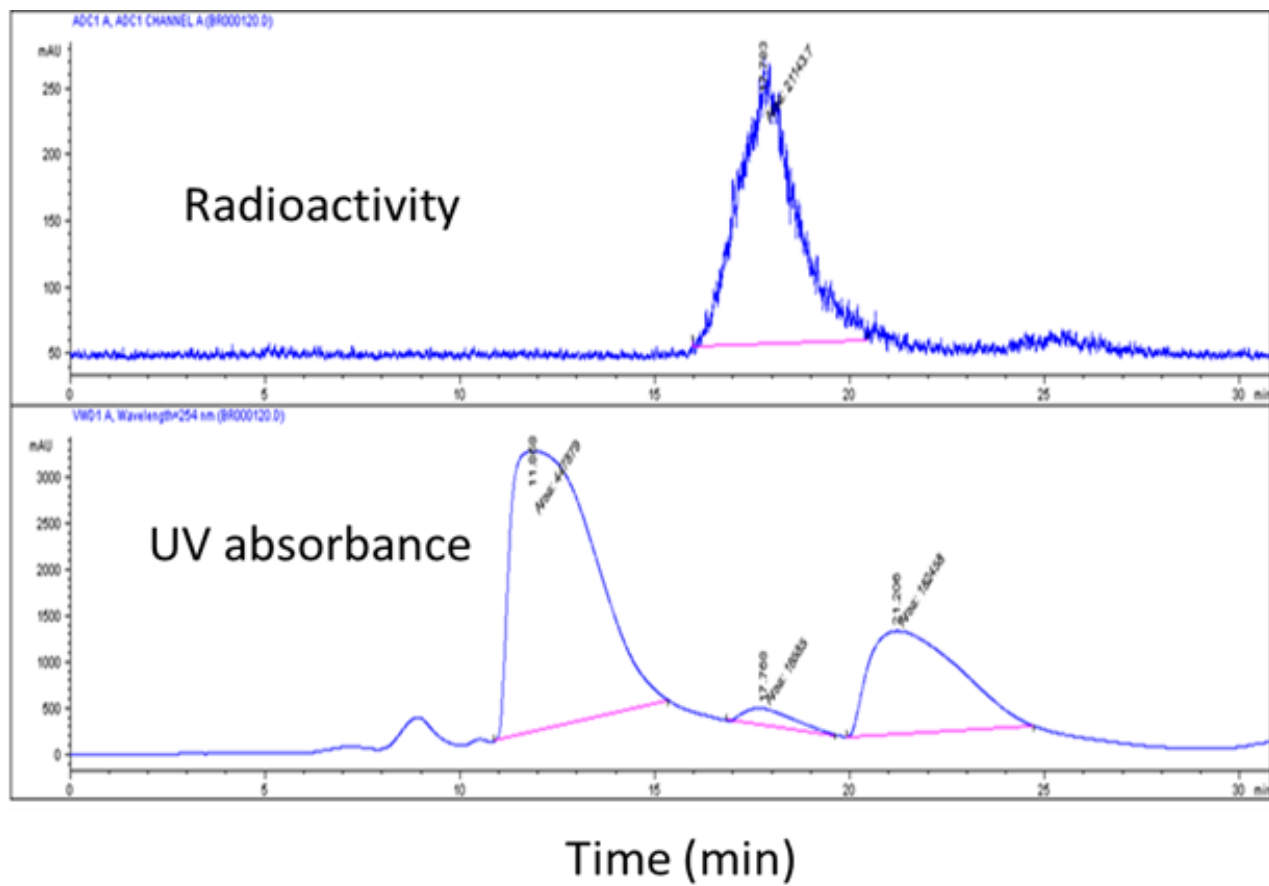

**Fig. S2.** Purification of [ $^{18}\text{F}$ ]fluoroethyl alectinib [ $^{18}\text{F}$ ]**4** by HPLC. Semi-preparative reverse phase amide column; 38% MeCN/62% H<sub>2</sub>O/0.1% TFA, flow 4 mL/min.

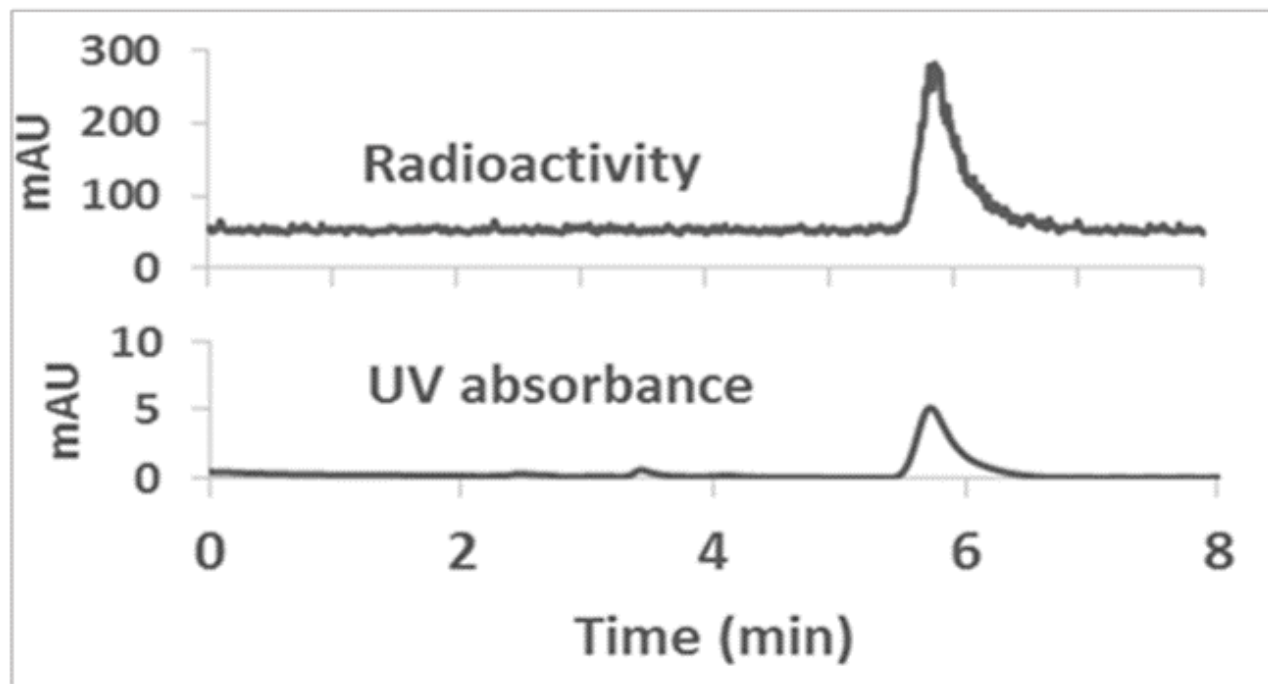

**Fig. S3.** HPLC chromatogram of [ $^{18}\text{F}$ ]fluoroethyl alectinib [ $^{18}\text{F}$ ]**4**, co-injected with the non-radioactive standard **4**. Analytical  $\text{C}_{18}$  column; 40% MeCN/60%  $\text{H}_2\text{O}$ /0.1% TFA, flow 1 mL/min.
